# Supplementary material for: Creation of Chemically Tri-Layered Collagen Crosslinked Membranes and Their Comparison with Ionically Tri-Layered Chitosan Crosslinked Membranes to Study Human Skin Properties
Source: MDPI journal article supplement (doi:10.3390/ijms241713443), 2023-08-30
Supplement: s1 [file s1]

## Supporting Information

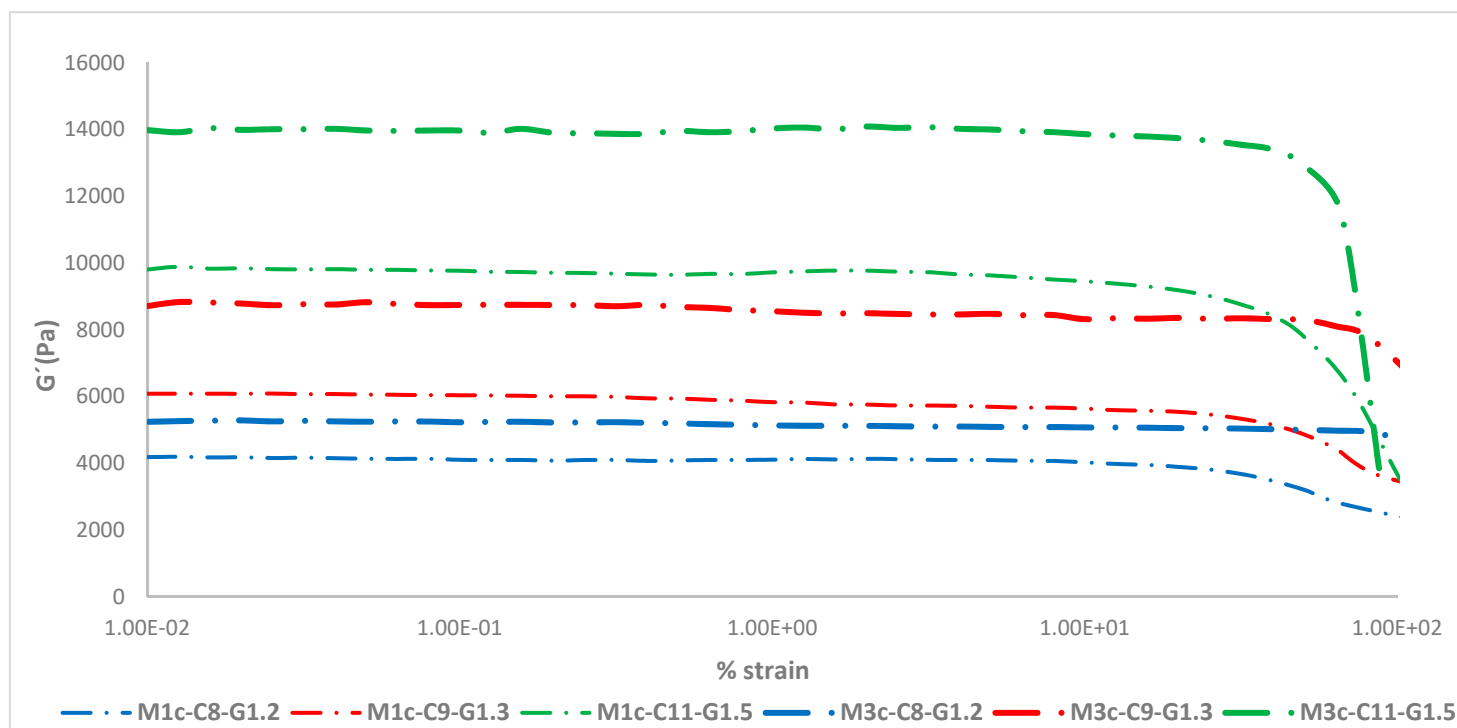

**Figure S1.** Representation of the effect of curing on the elastic modulus of cured mono-layered and cured tri-layered membranes.

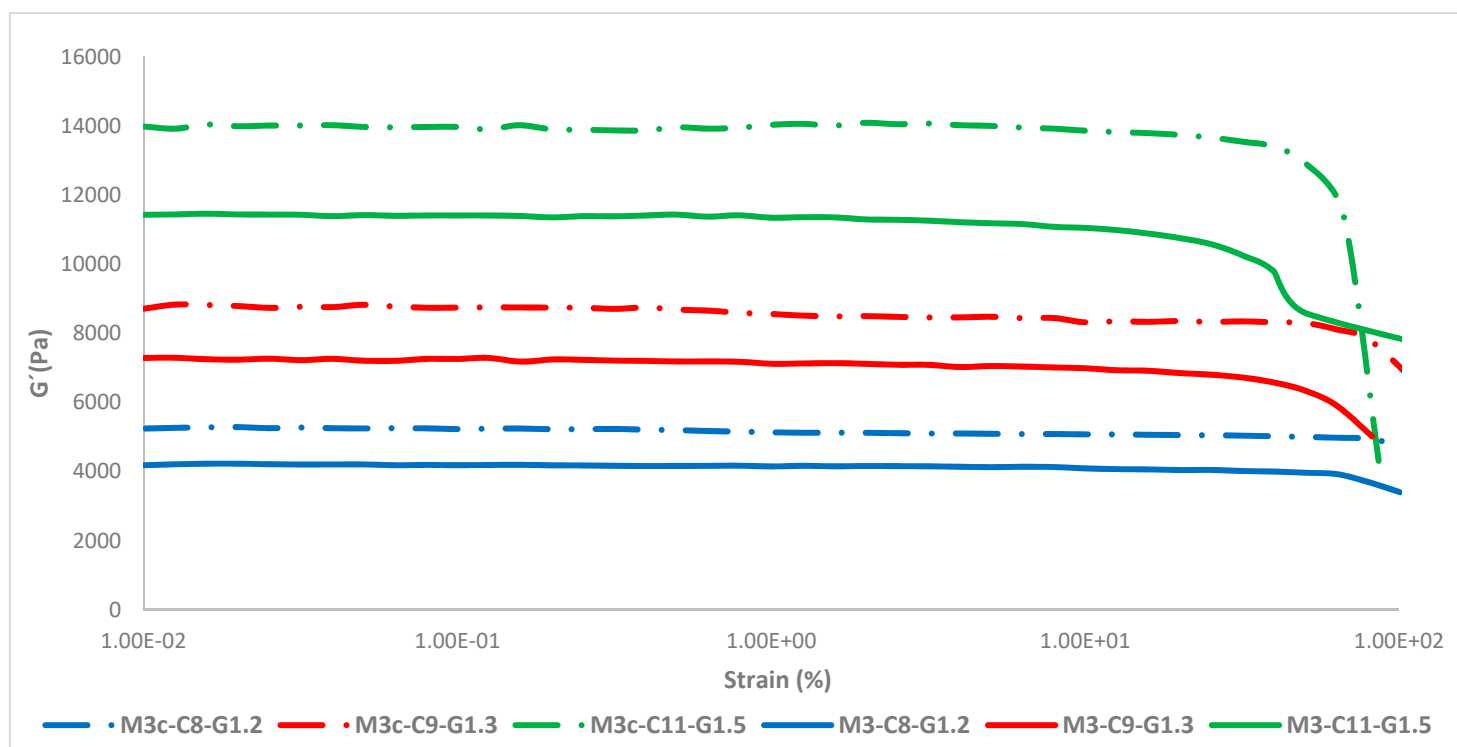

**Figure S2.** Representation of the curing effect on the elastic modulus of cured and non-cured tri-layered membranes.

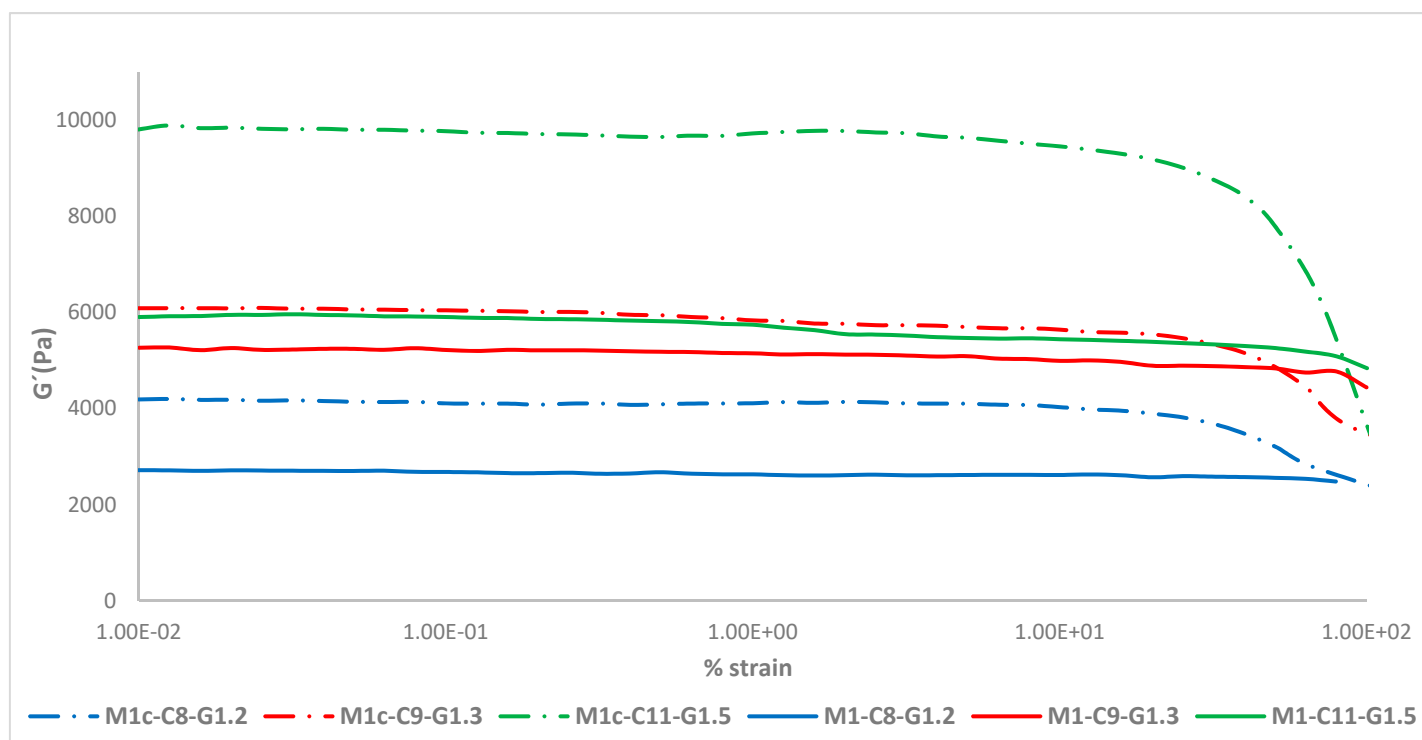

**Figure S3.** Representation of the curing effect on the elastic modulus of cured and non-cured mono-layered membranes.

**Table S1.** Special identification system for chitosan membranes [17].

| Position | Variable data                                             |
|----------|-----------------------------------------------------------|
| First    | <b>M</b> = membrane                                       |
| Second   | <b>3, 2, 1</b> = number of layers                         |
| Third    | <b>B</b> = base membrane or <b>A</b> = activated membrane |
| Fourth   | <b>C</b> = Chitosan                                       |
| Fifth    | <b>85</b> or <b>76</b> = %DDA                             |
| Sixth    | <b>A</b> or <b>H</b> = Aldrich or HMC + supplier          |
| Seventh  | <b>T</b> from TPP crosslinker                             |
| Eighth   | <b>X</b> or <b>0</b> = crosslinked or non-crosslinked     |

**Table S2.** Swelling comparative table of results with chitosan membranes [17].

| Chitosan membranes ID | Mean Maximum Swell% $\pm$ SD | Mean Maximum Swell% $\pm$ SD | Collagen Membranes ID |
|-----------------------|------------------------------|------------------------------|-----------------------|
| M3B-C85A-TX           | 107.0 $\pm$ 7.4              | 337.0 $\pm$ 5.5              | M3-C8-G1.2            |
| M3A-C85A-TX           | 114.0 $\pm$ 6.2              | 341.7 $\pm$ 4.9              | M3-C9-G1.3            |
| M3B-C85H-TX           | 114.0 $\pm$ 5.2              | 352.9 $\pm$ 4.1              | M3-C11-G1.5           |
| M3A-C85H-TX           | 115.0 $\pm$ 5.3              | 426.4 $\pm$ 18.3             | M1-C8-G1.2            |
| M3B-C76A-TX           | 256.0 $\pm$ 63.6             | 382.7 $\pm$ 15.7             | M1-C9-G1.3            |
| M3A-C76A-TX           | 386.0 $\pm$ 122.3            | 343.4 $\pm$ 11.1             | M1-C11-G1.5           |

**Table S3.** Comparative table of results of the rheometric test with non-crosslinked layers in tri-layered chitosan membranes [17].

| Chitosan membranes ID | Mean G' (Pa) $\pm$ SD   | Mean G' (Pa) $\pm$ SD  | Collagen Membranes ID |
|-----------------------|-------------------------|------------------------|-----------------------|
| M3B-C76A-T0           | 2141.58 $\pm$ 198.96    | 4114.66 $\pm$ 559.36   | M3-C8-G1.2            |
| M3A-C76A-T0           | 2587.29 $\pm$ 608.81    | 7014.64 $\pm$ 196.32   | M3-C9-G1.3            |
| M3B-C85A-T0           | 31,332.35 $\pm$ 7033.19 | 11,012.53 $\pm$ 100.60 | M3-C11-G1.5           |
| M3A-C85A-T0           | 37,512.59 $\pm$ 4967.79 |                        |                       |

**Table S4.** Comparative table of results of the rheometric test with cured tri-layered chitosan membranes [17].

| Chitosan membranes ID | Mean G' (Pa) $\pm$ SD    | Mean G' (Pa) $\pm$ SD  | Collagen Membranes ID |
|-----------------------|--------------------------|------------------------|-----------------------|
| M3B-C76A-TX           | 3559.46 $\pm$ 968.97     | 5246.19 $\pm$ 202.30   | M3c-C8-G1.2           |
| M3A-C76A-TX           | 5402.78 $\pm$ 1,096.34   | 8607.78 $\pm$ 95.96    | M3c-C9-G1.3           |
| M3B-C85H-TX           | 34,378.43 $\pm$ 2,702.69 | 13,677.95 $\pm$ 281.44 | M3c-C11-G1.5          |
| M3A-C85H-TX           | 35,538.68 $\pm$ 9,561.26 |                        |                       |
| M3B-C85A-TX           | 53,633.68 $\pm$ 2,413.52 |                        |                       |
| M3A-C85A-TX           | 45,997.65 $\pm$ 5,515.39 |                        |                       |

**Table S5.** Comparative table of results of the rheometric test with mono-layered chitosan membranes [17].

| Chitosan membranes ID | Mean G' (Pa) $\pm$ SD    | Mean G' (Pa) $\pm$ SD | Collagen Membranes ID |
|-----------------------|--------------------------|-----------------------|-----------------------|
| M1A-C76A              | 874.70 $\pm$ 161.95      | 2638.95 $\pm$ 216.54  | M1-C8-G1.2            |
| M1B-C76A              | 996.11 $\pm$ 6.48        | 3946.16 $\pm$ 373.22  | M1c-C8-G1.2           |
| M1A-C85A              | 20,299.41 $\pm$ 1,053.55 | 5685.29 $\pm$ 284.25  | M1-C9-G1.3            |
| M1B-C85A              | 21,199.80 $\pm$ 5,058.00 | 5758.55 $\pm$ 157.37  | M1c-C9-G1.3           |
|                       |                          | 5695.77 $\pm$ 92.85   | M1-C11-G1.5           |
|                       |                          | 9329.93 $\pm$ 417.36  | M1c-C11-G1.5          |

**Table S6.** DOE 1 variable data.

| Collagen % (w/w) | GTA % (w/w) | Dry time (days) |   |
|------------------|-------------|-----------------|---|
| 8.0              | 1.2         | 2               | + |
| 6.0              | 1.0         | 1               | - |

**Table S7.** Results of DOE 1 G' modulus.

| Membrane | GTA | Collagen | t dry | GTA x Collagen | GTA x t dry | Collagen x t dry | Mean of G' (Pa) |
|----------|-----|----------|-------|----------------|-------------|------------------|-----------------|
| 1        | +   | -        | -     | -              | -           | +                | 1698.00         |
| 2        | +   | +        | -     | +              | -           | -                | 2639.70         |
| 3        | +   | -        | +     | -              | +           | -                | 1331.17         |
| 4        | +   | +        | +     | +              | +           | +                | 1822.29         |
| 5        | -   | -        | -     | +              | +           | +                | 1470.68         |
| 6        | -   | +        | -     | -              | +           | -                | 2546.68         |
| 7        | -   | -        | +     | +              | -           | -                | 1175.80         |
| 8        | -   | +        | +     | -              | -           | +                | 2155.98         |

**Table S8.** Effects and interactions of the variables regarding module G' of the DOE 1.

| Effects  | Results | Interactions           | Results |
|----------|---------|------------------------|---------|
| GTA      | 35.25   | GTA x Collagen         | -155.75 |
| Collagen | 872.25  | GTA x t dry            | 284.25  |
| t dry    | -58.75  | Collagen x t dry       | 272.25  |
|          |         | GTA x Collagen x t dry | 320.25  |

**Table S9.** DOE 2 variable data.

| Collagen % (w/w) | GTA % (w/w) | Dry time (days) |   |
|------------------|-------------|-----------------|---|
| 9.0              | 1.3         | 2               | + |
| 7.0              | 1.1         | 1               | - |

**Table S10.** Results of DOE 2 G' modulus.

| Membrane | GTA | Collagen | t dry | GTA x Collagen | GTA x t dry | Collagen x t dry | Mean of G' (Pa) |
|----------|-----|----------|-------|----------------|-------------|------------------|-----------------|
| 1        | +   | -        | -     | -              | -           | +                | 2746.90         |
| 2        | +   | +        | -     | +              | -           | -                | 5685.29         |
| 3        | +   | -        | +     | -              | +           | -                | 3484.38         |
| 4        | +   | +        | +     | +              | +           | +                | 5097.67         |
| 5        | -   | -        | -     | +              | +           | +                | 2273.37         |
| 6        | -   | +        | -     | -              | +           | -                | 3434.05         |
| 7        | -   | -        | +     | +              | -           | -                | 3487.08         |
| 8        | -   | +        | +     | -              | -           | +                | 4145.46         |

**Table S11.** Effects and interactions of the variables regarding module G' of the DOE 2.

| Effects  | Results  | Interactions           | Results |
|----------|----------|------------------------|---------|
| GTA      | 918.75   | GTA x Collagen         | 683.25  |
| Collagen | 1,592.75 | GTA x t dry            | -443.75 |
| t dry    | 518.75   | Collagen x t dry       | -456.75 |
|          |          | GTA x Collagen x t dry | -205.25 |

**Table S12.** DOE 3 variable data.

| Collagen % (w/w) | GTA % (w/w) | Dry time (days) |   |
|------------------|-------------|-----------------|---|
| 11.0             | 1.3         | 2               | + |
| 9.0              | 1.5         | 1               | - |

**Table S13.** Results of DOE 3 G' modulus.

| Membrane | GTA | Collagen | t dry | GTA x Collagen | GTA x t dry | Collagen x t dry | Mean of G' (Pa) |
|----------|-----|----------|-------|----------------|-------------|------------------|-----------------|
| 1        | +   | -        | -     | -              | -           | +                | 3967.74         |
| 2        | +   | +        | -     | +              | -           | -                | 5962.14         |
| 3        | +   | -        | +     | -              | +           | -                | 2568.91         |
| 4        | +   | +        | +     | +              | +           | +                | 4003.29         |
| 5        | -   | -        | -     | +              | +           | +                | 2418.80         |
| 6        | -   | +        | -     | -              | +           | -                | 5707.54         |
| 7        | -   | -        | +     | +              | -           | -                | Null            |
| 8        | -   | +        | +     | -              | -           | +                | 4282.15         |

**Table S14.** Effects and interactions of the variables regarding module G' of the DOE 3.

| Effects  | Results | Interactions           | Results |
|----------|---------|------------------------|---------|
| GTA      | 948.5   | GTA x Collagen         | -1111.0 |
| Collagen | 2675.0  | GTA x t dry            | 1026.0  |
| t dry    | -896.0  | Collagen x t dry       | 1012.5  |
|          |         | GTA x Collagen x t dry | 516.5   |
